# Supplementary material for: Comparative Genomics of Marine Bacteria from a Historically Defined Plastic Biodegradation Consortium with the Capacity to Biodegrade Polyhydroxyalkanoates
Source: MDPI journal article supplement (doi:10.3390/microorganisms9010186), 2021-01-16
Supplement: s1 [file s1]

## Supplementary Materials

**Table S1.** Metadata regarding species used for the phylogenetic analysis of the NTK community strains. Strain synonyms, isolation-associated information, and type strain designation are mentioned.

| Species                                    | Strain synonyms                                                                                                                                                                                                   | Isolation associated information                                                                                                                  | Type strain | Reference / GenBank accession |
|--------------------------------------------|-------------------------------------------------------------------------------------------------------------------------------------------------------------------------------------------------------------------|---------------------------------------------------------------------------------------------------------------------------------------------------|-------------|-------------------------------|
| <i>Aliivibrio fischeri</i><br>ATCC 7744    | BCRC 12900, CAIM 329, CCUG 13450, CCUG 16305, CECT 524, CIP 103206, CIP 75.08, DSM 507, LMG 4414, JCM 18803, KCTC 12272, KCTC 12386, NCIMB 1281, NRRL B-761, NRRL B-41164                                         | Isolation source: fish (bioluminescent)<br>Collection date: 1888<br>Location: N/A                                                                 | ✓           | [1]                           |
| <i>Anaerobacillus macyae</i><br>DSM 16346  | CIP 108766, JCM 12340, JMM-4                                                                                                                                                                                      | Isolation source: gold mine<br>Collection date: 01-JAN-2004<br>Location: Bendigo, Victoria, Australia                                             | ✓           | [2]                           |
| <i>Bacillus algalicola</i><br>KMM 3737     | CIP 107850, KCTC 13005                                                                                                                                                                                            | Isolation source: <i>Fucus evanescens</i> (brown algae)<br>Collection date: 1999<br>Location: Kraternaya Bight, Kuril Islands                     | ✓           | [3]                           |
| <i>Bacillus altitudinis</i><br>41KF2b      | BCRC 17879, DSM 21631, JCM 13350, MTCC 7306                                                                                                                                                                       | Isolation source: cryogenic tube used for collecting air samples<br>Collection date: 2001<br>Location: 41 km altitude, India (17.4722°/ 78.5800°) | ✓           | [4]                           |
| <i>Bacillus amyloliquefaciens</i><br>DSM 7 | ATCC 23350, BCRC 11601, Campbell F, CCUG 28519, F, Fukomoto F, IFO 15535, NBRC 15535, NCCB 91058, NRRL B-14393                                                                                                    | Isolation source: soil and industrial amylase fermentations<br>Collection date: before 1943<br>Location: N/A                                      | ✓           | [5]                           |
| <i>Bacillus aquimaris</i><br>TF-12         | DSM 16205, JCM 11545, KCCM 41589                                                                                                                                                                                  | Isolation source: sea water of a tidal flat<br>Collection date: 06-NOV-2009<br>Location: Yellow Sea, South Korea                                  | ✓           | [6]                           |
| <i>Bacillus atrophaeus</i><br>1942         | Vogel                                                                                                                                                                                                             | Isolation source: unknown, terrestrial<br>Collection date: 1930s-1940s presumably<br>Location: N/A                                                | -           | [7]                           |
| <i>Bacillus atrophaeus</i><br>JCM9070      | ATCC 49337, BCRC 17123, CCUG 28524, DSM 7264, NBRC 15539, NCIMB 12899, NRRL-NRS 213                                                                                                                               | Isolation source: soil<br>Collection date: 1940<br>Location: Colorado, USA                                                                        | ✓           | [8]                           |
| <i>Bacillus cereus</i><br>ATCC 14579       | BCRC 10603, CCM 2010, CCUG 7414, CIP 66.24, DSM 31, Ford 13, Gibson 971, HAMBI 1887, HAMBI 1905, IAM 12605, JCM 2152, LMG 6923, NBRC 15305, NCCB 75008, NCIMB 9373, NCTC 2599, NRRL B-3711, UCM B-5650, VKM B-504 | Isolation source: air<br>Collection date: before 1887<br>Location: N/A                                                                            | ✓           | [9]                           |
| <i>Bacillus cytotoxicus</i><br>NVH 391-98  | CIP 110041, DSM 22905                                                                                                                                                                                             | Isolation source: vegetable puree, related to food poisoning<br>Collection date: 1998<br>Location: retirement house, France                       | ✓           | [10]                          |

|                                              |                                                                                                                                                                                                                     |                                                                                                                                                                         |   |              |
|----------------------------------------------|---------------------------------------------------------------------------------------------------------------------------------------------------------------------------------------------------------------------|-------------------------------------------------------------------------------------------------------------------------------------------------------------------------|---|--------------|
| <i>Bacillus firmus</i><br>EN 5C              | N/A                                                                                                                                                                                                                 | Isolation source: agricultural soil<br>Collection date: N/A<br>Location: Visakhapatnam district, Andhra Pradesh, India                                                  | - | [11]         |
| <i>Bacillus firmus</i><br>NCTC 10335         | ATCC 14575, BCRC 11730, CCM 2213, CCUG 7418, CIP 52.70, DSM 12, HAMBI 1886, IAM 12464, JCM 2512, LMG 7125, NBRC 15306, NCAIM B.01087, NCCB 48015, NCIMB 9366, NCTC 10335, NRRL B-14307, NRRL NRS-613, VKM B-498     | Isolation source: soil<br>Collection date: before 1933<br>Location: N/A                                                                                                 | ✓ | [12]         |
| <i>Bacillus gottheilii</i><br>WCC 4585       | CCUG 59876, DSM 23668, G 6155, LMG 25856                                                                                                                                                                            | Isolation source: clean room of production line of pharmaceutical manufacturing site for vaccines<br>Collection date: 2008<br>Location: Sachsen-Anhalt, Dessau, Germany | ✓ | [13]         |
| <i>Bacillus hwojinpoensis</i><br>22506_14_FS | N/A                                                                                                                                                                                                                 | Isolation source: fleur de sel salt<br>Collection date: N/A<br>Location: grocery store, France                                                                          | - | WMEY01000019 |
| <i>Bacillus hwojinpoensis</i><br>Y2          | N/A                                                                                                                                                                                                                 | Isolation source: salt water<br>Collection date: 01-Feb-2019<br>Location: Hampton Beach, New Hampshire, USA (42.899 N / 70.81085 W)                                     | - | SWFM01000018 |
| <i>Bacillus infantis</i><br>NRRL B-14911     | N/A                                                                                                                                                                                                                 | Isolation source: open ocean 10 m depth<br>Collection date: JUN-1992<br>Location: Gulf of Mexico, near the Bimini Islands, Bahamas                                      | - | [14]         |
| <i>Bacillus krulwichiae</i><br>AM31D         | DSM 18225, IAM 15000, JCM 11691, NCIMB 13904                                                                                                                                                                        | Isolation source: aromatic-compound-contaminated garden soil<br>Collection date: before 2003<br>Location: Tsukuba, Ibaraki, Japan (36.1167 N/ 140.2167 E)               | ✓ | [15]         |
| <i>Bacillus marisflavi</i><br>151-25         | N/A                                                                                                                                                                                                                 | Isolation source: Cd-contaminated soil (59.561 ± 3.76 mg Cd kg <sup>-1</sup> )<br>Collection date: APR-2016<br>Location: Hunan, China                                   | - | [16]         |
| <i>Bacillus marisflavi</i><br>TF-11          | DSM 16204, JCM 11544, KCCM 41588                                                                                                                                                                                    | Isolation source: sea water of a tidal flat<br>Collection date: 01-JAN-2003<br>Location: Yellow Sea, South Korea                                                        | ✓ | [6]          |
| <i>Bacillus megaterium</i><br>IAM 13418      | ATCC 14581, BCRC 10608, CCM 2007, CCUG 1817, CIP 66.20, DSM 32, Ford 19, Gibson 1060, HAMBI 2018, JCM 2506, KCTC 3007, LMG 7127, NBRC 15308, NCCB 75016, NCIMB 9376, NCTC 10342, NRIC 1710, NRRL B-14308, VKM B-512 | Isolation source: environmental sample<br>Collection date: before 1884<br>Location: N/A                                                                                 | ✓ | [17]         |
| <i>Bacillus oceanisediminis</i><br>2691      | KCTC 33020                                                                                                                                                                                                          | Isolation source: marine sediment<br>Collection date: AUG-1999<br>Location: Tae-an-gun, Chungchungnam-do, South Korea                                                   | - | [18]         |

|                                            |                                                                                                                                                                   |                                                                                                                                                                               |   |          |
|--------------------------------------------|-------------------------------------------------------------------------------------------------------------------------------------------------------------------|-------------------------------------------------------------------------------------------------------------------------------------------------------------------------------|---|----------|
| <i>Bacillus oceanisediminis</i> H2         | CGMCC 1.10115, DSM 24771, JCM 16506                                                                                                                               | Isolation source: marine sediment, 823 m depth<br>Collection date: before 2010<br>Location: South Sea, China                                                                  | ✓ | [19]     |
| <i>Bacillus oryzaecorticis</i> IHB B 17121 | N/A                                                                                                                                                               | Isolation source: saffron rhizosphere<br>Collection date: before 2017<br>Location: Drussu, Jammu & Kashmir, India                                                             | - | KY933462 |
| <i>Bacillus pseudofirmus</i> DSM 8715      | ATCC 700159, C 324, NCIMB 10283, PN 3                                                                                                                             | Isolation source: lake bank soil<br>Collection date: before 1994<br>Location: Holstein, Germany                                                                               | ✓ | [20]     |
| <i>Bacillus shackletonii</i> LMG 18435     | B1724, DSM 18868, CIP 107762, KCTC 13003                                                                                                                          | Isolation source: mossy soil, eastern lava flow<br>Collection date: 1996–1997 austral summer<br>Location: Lucifer Hill, northern Candlemas Island, South Sandwich archipelago | ✓ | [21]     |
| <i>Bacillus</i> sp. BW3PhG2                | N/A                                                                                                                                                               | Isolation source: <i>Pyropia haitanensis</i> (red algae) phycosphere<br>Collection date: NOV-2010<br>Location: China                                                          | - | [22]     |
| <i>Bacillus</i> sp. JL-29                  | N/A                                                                                                                                                               | Isolation source: eutrophic estuary<br>Collection date: before 2006<br>Location: Yangtze River, China                                                                         | - | [23]     |
| <i>Bacillus</i> sp. MN-003                 | N/A                                                                                                                                                               | Isolation source: tropical marine sediments contaminated with marine fuel oil<br>Collection date: before 2002<br>Location: beach in south Singapore                           | - | [24]     |
| <i>Bacillus</i> sp. N1-1                   | N/A                                                                                                                                                               | Isolation source: deep-sea water, 1133 m depth<br>Collection date: 24-SEP-2017<br>Location: South China Sea, China (22.115 N 119.283 E)                                       | - | [25]     |
| <i>Bacillus subtilis</i> DSM10             | ATCC 6051, BGSC 3A1, CCM 2216, CCUG 163, IAM 12118, IFO 13719, JCM 1465, LMG 7135, NBRC 13719, NCIB 3610, NCTC 3610, NCDO 1769, NCIMB 3610, NRRL NRS-744, Marburg | Isolation source: N/A<br>Collection date: around 1900<br>Location: N/A                                                                                                        | ✓ | [26]     |
| <i>Bacillus thuringiensis</i> ATCC 10792   | Berliner, CCM 19, CCUG 7429, CIP 53.137, DSM 2046, HAMBI 478, IAM 12077, LMG 7138, NCAIM B.01292, NCCB 70008, NCIB 9134, NRRL HD-735, VKM B-1544                  | Isolation source: <i>Ephestia kuehniella</i> (Mediterranean flour moth)<br>Collection date: before 1915<br>Location: N/A                                                      | ✓ | [27]     |
| <i>Bacillus toyonensis</i> BCT-7112        | NCIMB 14858, CECT 876                                                                                                                                             | Isolation source: soil<br>Collection date: 01-JAN-1966<br>Location: Izu, Shizuoka, Japan                                                                                      | ✓ | [28]     |
| <i>Bacillus vietnamensis</i> 151-6         | N/A                                                                                                                                                               | Isolation source: Cd-contaminated soil ( $59.561 \pm 3.76$ mg Cd kg <sup>-1</sup> )<br>Collection date: APR-2016<br>Location: Hunan, China                                    | - | [16]     |

|                                                    |                                                                                                         |                                                                                                                                                                                                                            |   |      |
|----------------------------------------------------|---------------------------------------------------------------------------------------------------------|----------------------------------------------------------------------------------------------------------------------------------------------------------------------------------------------------------------------------|---|------|
| <i>Bacillus vietnamensis</i><br>NBRC 101237        | BCRC 80102, CIP 108672, DSM 18898,<br>HSCC 1663, JCM 11124, NRIC 0531,<br>NRRL B-23890, LMG 24742, 15-1 | Isolation source: fish sauce<br>Collection date: before 2000<br>Location: Vietnam                                                                                                                                          | ✓ | [29] |
| <i>Bacillus wiedmannii</i><br>FSL W8-0169          | CIP 111364, DSM 102050, LMG 29269                                                                       | Isolation source: raw milk stored in a dairy<br>powder processing plant silo<br>Collection date: 29-APR-2012<br>Location: New York state, USA                                                                              | ✓ | [30] |
| <i>Celeribacter baekdonensis</i><br>L-6            | CCUG 60799, DSM 27375, KCTC 23497                                                                       | Isolation source: seawater<br>Collection date: 2007<br>Location: Baekdo harbour, East Sea,<br>Korea                                                                                                                        | ✓ | [31] |
| <i>Deftuovimonas alba</i><br>cai42                 | CGMCC 1.12518, LMG 27406                                                                                | Isolation source: oil-production water<br>Collection date: JUN-2011<br>Location: Xinjiang, China                                                                                                                           | ✓ | [32] |
| <i>Gemmobacter tilapia</i><br>Ruye-53              | BCRC 80261, KCTC 23310                                                                                  | Isolation source: freshwater pond, used to<br>rear tilapiine cichlid fish ( <i>Tilapia rendalli</i> )<br>Collection date: before 2013<br>Location: Taitung city, eastern Taiwan (22°<br>56' 42" N / 121° 09' 18" E)        | ✓ | [33] |
| <i>Haematobacter massiliensis</i><br>CCUG 47968    | CIP 107725, framboise                                                                                   | Isolation source: nose of a patient with<br>aspiration pneumonia<br>Collection date: 2003<br>Location: Marseilles, France                                                                                                  | ✓ | [34] |
| <i>Paracoccus zeaxanthinifaciens</i><br>ATCC 21588 | CIP 108019, IAM 15326, JCM 21774,<br>LMG 21293, R-1512                                                  | Isolation source: seaweed<br>Collection date: before 1975<br>Location: coast of the African Red Sea                                                                                                                        | ✓ | [35] |
| <i>Pararhodobacter</i><br>sp.<br>CCB-MM2           | N/A                                                                                                     | Isolation source: mangrove soil, 10 cm<br>depth<br>Collection date: 02-OCT-2014<br>Location: Matang Mangrove Forest,<br>Malaysia (4.21335 N / 100.6470899999993<br>E)                                                      | - | [36] |
| <i>Pararhodobacter</i><br>sp.<br>CIC4N-9           | KCTC 52336, MCCC 1A01225                                                                                | Isolation source: deep-sea water, 2391 m<br>depth<br>Collection date: 2015-2016<br>Location: Southwest Indian Ridge, Indian<br>ocean (51.06° E / 37.53° S)                                                                 | - | [37] |
| <i>Rhodobacter aestuarii</i><br>JA296              | CCUG 55130, DSM 19945, JCM 14887                                                                        | Isolation source: mud from brown-coloured<br>microbial mat from brackish water<br>Collection date: 15-JUN-2007<br>Location: Bhitarkanika mangrove forest,<br>Dangmal, Orissa, India (2° 49' N 8° 47' E)                    | ✓ | [38] |
| <i>Rhodobacter</i> sp.<br>Bo10-19                  | N/A                                                                                                     | Isolation source: <i>Oscillatoria brevis</i><br>(filamentous cyanobacteria) culture<br>Collection date: between 1992 and 1994<br>Location: sediment of shallow coastal<br>waters of the Baltic Sea, Boiensdorf,<br>Germany | - | [39] |

|                                           |                                                                                                                                                                                                         |                                                                                                                                                                                                      |   |          |
|-------------------------------------------|---------------------------------------------------------------------------------------------------------------------------------------------------------------------------------------------------------|------------------------------------------------------------------------------------------------------------------------------------------------------------------------------------------------------|---|----------|
| <i>Rhodobacter</i> sp.<br>LW4             | N/A                                                                                                                                                                                                     | Isolation source: water<br>Collection date: 25-AUG-2008<br>Location: Lonar Lake, Lonar, Buldhana district, Maharashtra, India                                                                        | - | FM956479 |
| <i>Rhodobacter</i> sp.<br>R18             | N/A                                                                                                                                                                                                     | Isolation source: <i>Nannochloropsis oculata</i> (phytoplankton)<br>Collection date: before 2011<br>Location: Susami Fish Nursery Center, Kinki University, Japan                                    | - | [40]     |
| <i>Rhodobacter sphaeroides</i><br>2.4.1   | ATCC 11167, ATCC 14690, ATCC 17023, CCUG 31486, CIP 60.6, DSM 158, IAM 14237, LMG 2827, NCIB 8253                                                                                                       | Isolation source: N/A<br>Collection date: before 1944<br>Location: N/A                                                                                                                               | ✓ | [41]     |
| <i>Rhodobacter vinaykumarii</i><br>JA123  | DSM 18714, CCUG 54311, CIP 109721, JCM 14544,                                                                                                                                                           | Isolation source: tidal seawater<br>Collection date: 16-APR-2005<br>Location: Bay of Bengal, Visakhapatnam, Ramakrishna beach, India                                                                 | ✓ | [42]     |
| <i>Roseicitreum antarcticum</i><br>ZS2-28 | CGMCC 1.8894, LMG 24863                                                                                                                                                                                 | Isolation source: coastal region, sandy intertidal sediment<br>Collection date: MAR-2007<br>Location: Chinese Antarctic Zhongshan Station, Larsemann Hills, Princess Elizabeth Land, East Antarctica | ✓ | [43]     |
| <i>Vibrio alginolyticus</i><br>ATCC 33787 | N/A                                                                                                                                                                                                     | Isolation source: seawater<br>Collection date: 05-APR-1971<br>Location: Oahu, Hawaii, USA, (20.3 N 157.3 W)                                                                                          | - | [44]     |
| <i>Vibrio alginolyticus</i><br>NBRC 15630 | ATCC 17749, Baumann 118, CAIM 516, CCM 2578, CIP 75.3, CIP 103336, CCUG 4989, CCUG 13445, CCUG 16315, DSM 2171, IFO 15630, NBRC 15630, NCCB 71013, NCCB 77003, NCTC 12160, NCIMB 1903, LMG 4409, XII-53 | Isolation source: spoiled horse mackerel, causing food poisoning<br>Collection date: before 1961<br>Location: Japan                                                                                  | ✓ | [45]     |
| <i>Vibrio atypicus</i><br>HHS02           | CGMCC 1.8461, DSM 25292, LMG 24781                                                                                                                                                                      | Isolation source: Digestive tract of healthy Chinese prawns <i>Penaeus chinensis</i> O'sbeck<br>Collection date: before 2010<br>Location: Qingdao, China                                             | ✓ | [46]     |
| <i>Vibrio campbellii</i><br>CAIM 519      | ATCC 25920, Baumann 40, CCM 2582, CCUG 4979, CCRC 12909, CECT 523, CIP 75.01, DSM 19270, Lee MV2189, NCTC 11317, IFO 15631, LMD 73.2, LMG 11216, NBRC 15631, NCIMB 1894, Verdonck VIB 285               | Isolation source: seawater, 800 m depth<br>Collection date: before 1971<br>Location: Hawaii, USA (20.5000°/ 157.5000°)                                                                               | ✓ | [44]     |
| <i>Vibrio cholerae</i><br>CECT 514        | ATCC 14035, CCUG 9118, CDC 9060-79, CIP 62.13, DSM 100200, JCM 852, KCTC 23507, NCCB 80091, NCCB 36033, NCTC 8021                                                                                       | Isolation source: human fecal sample<br>Collection date: before 1854<br>Location: N/A                                                                                                                | ✓ | [47]     |
| <i>Vibrio diabolis</i><br>FDAARGOS_105    | ATCC 33810, Baumann 611, Lee 5299, LMG 11654, Shehabi 36, Verdonck VIB 383                                                                                                                              | Isolation source: human (vibrio infected) feces<br>Collection date: before 1981<br>Location: Amman, Jordan                                                                                           | - | [48]     |

|                                                        |                                                                                                                                                                                                                                                                    |                                                                                                                                                                                                                      |   |      |
|--------------------------------------------------------|--------------------------------------------------------------------------------------------------------------------------------------------------------------------------------------------------------------------------------------------------------------------|----------------------------------------------------------------------------------------------------------------------------------------------------------------------------------------------------------------------|---|------|
| <i>Vibrio furnissii</i><br>ATCC 35016                  | CCUG 37301, CDC B3215, CIP 102972,<br>DSM 19622, FDAARGOS_777, KCTC<br>2731, LMG 7910, NCTC 13120                                                                                                                                                                  | Isolation source: human feces of an adult<br>woman with gastroenteritis<br>Collection date: 1969<br>Location: Japan                                                                                                  | ✓ | [49] |
| <i>Vibrio harveyi</i><br>FDAARGOS_107                  | ATCC 43516, LMG 11755, Verdonck<br>VIB 351                                                                                                                                                                                                                         | Isolation source: mouth of a shark<br>Collection date: before 1985<br>Location: Bahamas                                                                                                                              | - | [50] |
| <i>Vibrio natriegens</i><br>NBRC 15636                 | ATCC 14048, Baumann 111, DSM 759,<br>CCM 2575, CCUG 16371, CIP 103193,<br>CIP 75.07, NCIMB 857                                                                                                                                                                     | Isolation source: salt marsh mud<br>Collection date: before 1958<br>Location: Sapelo Island, Georgia, USA                                                                                                            | ✓ | [51] |
| <i>Vibrio</i><br><i>parahaemolyticus</i><br>ATCC 17802 | ATCC 17802, Baumann 113, CAIM 320,<br>CCUG 14474, CCUG 15657, CCTM<br>2011, CECT 511, CDC 9062-79, CIP<br>75.02, DSM 10027, EB 101,<br>FDAARGOS_115, FIRDI 806, Lee<br>MV1424, NCIMB 1902, NCTC 10903,<br>RIMD 2210001, USCC 2240, Verdonck<br>VIB 304, WDCM 00037 | Isolation source: shirasu (food poisoned<br>victim)<br>Collection date: 1951<br>Location: Japan                                                                                                                      | ✓ | [52] |
| <i>Vibrio</i><br><i>proteolyticus</i><br>NBRC 13287    | ATCC 15338, CAIM 511, CCUG 20302,<br>CCEB 710, CIP 710, CIP 73.06, CIP<br>102892, DSM 30189, IFO 13287, NCIMB<br>1326, LMG 3772, KCTC 2730, Popoff<br>262                                                                                                          | Isolation source: intestine of <i>Limnoria</i><br><i>tripunctata</i> (wood boring isopod) from<br>wooden pilings<br>Collection date: before 1958<br>Location: Fort Johnson Marine Laboratory,<br>Charleston, SC, USA | ✓ | [53] |
| <i>Vibrio rotiferianus</i><br>B64D1                    | N/A                                                                                                                                                                                                                                                                | Isolation source: bottom water (17.5 m)<br>Collection date: AUG-2015<br>Location: Bohai Sea, China (38.23 N,<br>119.04 E)                                                                                            | - | [54] |
| <i>Vibrio tubiashii</i><br>ATCC 19109                  | CAIM 313, CCUG 19118, CCUG 38428,<br>CECT 4196, CIP 102760, DSM 19142,<br>IFO 15644, LMG 10936, NBRC 15644,<br>NCIMB 1340, Milford 74                                                                                                                              | Isolation source: larvae from hard clams<br><i>Mercenaria mercenaria</i> )<br>Collection date: 1965<br>Location: Long Island Sound, Connecticut,<br>USA                                                              | ✓ | [55] |
| <i>Vibrio xiamenensis</i><br>G21                       | CGMCC 1.10228, DSM 22851                                                                                                                                                                                                                                           | Isolation source: soil beneath mangrove<br>Collection date: before 2010<br>Location: Xiamen, Fujian province, China                                                                                                  | ✓ | [56] |

**Supplementary Table S2.** 16S rRNA gene sequence information for the taxa included in phylogenetic tree reconstruction.

| Species                                    | GenBank accession number | Nucleotide region | Reference                          |
|--------------------------------------------|--------------------------|-------------------|------------------------------------|
| <i>Aliivibrio fischeri</i> ATCC 7744       | X74702                   | 1 - 1467          | [57]                               |
| <i>Anaerobacillus macysae</i> DSM 16346    | LELK01000003             | 66 - 1619         | [58]                               |
| <i>Bacillus algalicola</i> KMM 3737        | AY228462                 | 1 - 1545          | [3]                                |
| <i>Bacillus altitudinis</i> 41KF2b         | AJ831842                 | 1 - 1506          | [4]                                |
| <i>Bacillus amyloliquefaciens</i> DSM 7    | FN597644                 | 91526 - 93063     | [59]                               |
| <i>Bacillus aquimaris</i> TF-12            | AF483625                 | 1 - 1507          | [6]                                |
| <i>Bacillus atrophaeus</i> 1942            | CP002207                 | 3638254 - 3639812 | [7]                                |
| <i>Bacillus atrophaeus</i> JCM9070         | AB021181                 | 1 - 1515          | [60]                               |
| <i>Bacillus cereus</i> ATCC 14579          | AE016877                 | 9188 - 10699      | [61]                               |
| <i>Bacillus cytotoxicus</i> NVH 391-98     | AM747234                 | 1 - 1532          | [62]                               |
| <i>Bacillus firmus</i> EN 5C               | KY399766                 | 1 - 1522          | [11]                               |
| <i>Bacillus firmus</i> NCTC 10335          | UFTC01000001             | 102662 - 104217   | Direct submission<br>(06-JUN-2018) |
| <i>Bacillus gottheilii</i> WCC 4585        | FN995266                 | 1 - 1512          | [13]                               |
| <i>Bacillus hwajinpoensis</i> 22506_14_FS  | WMEY01000019             | 1 - 1466          | Direct Submission<br>(07-NOV-2019) |
| <i>Bacillus hwajinpoensis</i> Y2           | SWFM01000018             | 86 - 1640         | Direct Submission<br>(24-APR-2019) |
| <i>Bacillus infantis</i> NRRL B-14911      | CP006643                 | 267863 - 269416   | [63]                               |
| <i>Bacillus krulwichiae</i> AM31D          | AB086897                 | 1 - 1507          | [15]                               |
| <i>Bacillus marisflavi</i> 151-25          | CP047095                 | 364983 - 366536   | [16]                               |
| <i>Bacillus marisflavi</i> TF-11           | AF483624                 | 1 - 1506          | [6]                                |
| <i>Bacillus megaterium</i> IAM 13418       | D16273                   | 1 - 1486          | [64]                               |
| <i>Bacillus oceanisediminis</i> 2691       | CP015506                 | 172748 - 174302   | [18]                               |
| <i>Bacillus oceanisediminis</i> H2         | GQ292772                 | 1 - 1393          | [19]                               |
| <i>Bacillus oryzaecorticis</i> IHB B 17121 | KY933462                 | 1 - 1524          | Direct Submission<br>(13-APR-2017) |
| <i>Bacillus pseudofirmus</i> DSM 8715      | X76439                   | 1 - 1506          | [65]                               |
| <i>Bacillus shackletonii</i> LMG 18435     | AJ250318                 | 1 - 1503          | [21]                               |
| <i>Bacillus</i> sp. BW3PhG2                | KC012849                 | 1 - 1545          | [22]                               |
| <i>Bacillus</i> sp. JL-29                  | AY646165                 | 1 - 1516          | [23]                               |
| <i>Bacillus</i> sp. MN-003                 | AF355627                 | 1 - 1514          | [24]                               |
| <i>Bacillus</i> sp. N1-1                   | CP046564                 | 9504 - 11061      | [25]                               |
| <i>Bacillus subtilis</i> DSM10             | AJ276351                 | 1 - 1517          | Direct submission<br>(07-MAR-2000) |
| <i>Bacillus thuringiensis</i> ATCC 10792   | CP021061                 | 88791 - 90346     | [66]                               |
| <i>Bacillus toyonensis</i> BCT-7112        | CP006863                 | 2650827 - 2652381 | [28]                               |
| <i>Bacillus vietnamensis</i> 151-6         | CP047394                 | 38967 - 40522     | [16]                               |

|                                                 |              |                   |                                    |
|-------------------------------------------------|--------------|-------------------|------------------------------------|
| <i>Bacillus vietnamensis</i> NBRC 101237        | BCVQ01000102 | 79 - 1636         | Direct Submission<br>(26-FEB-2016) |
| <i>Bacillus wiedmannii</i> FSL W8-0169          | KU198626     | 1 - 1540          | [30]                               |
| <i>Celeribacter baekdonensis</i> L-6            | HM997022     | 1 - 1423          | [31]                               |
| <i>Deftuviimonas alba</i> cai42                 | CP012661     | 4102517 - 4103969 | [67]                               |
| <i>Gemmobacter tilapia</i> Ruye-53              | HQ111526     | 1 - 1402          | [33]                               |
| <i>Haematobacter massiliensis</i> CCUG 47968    | AF452106     | 1 - 1414          | [34]                               |
| <i>Paracoccus zeaxanthinifaciens</i> ATCC 21588 | AF461158     | 1 - 1404          | [35]                               |
| <i>Pararhodobacter</i> sp. CCB-MM2              | LRRR01000059 | 250 - 1695        | [36]                               |
| <i>Pararhodobacter</i> sp. CIC4N-9              | QEYD01000020 | 242 - 1709        | [37]                               |
| <i>Rhodobacter aestuarii</i> JA296              | AM748926     | 1 - 1369          | [38]                               |
| <i>Rhodobacter</i> sp. Bo10-19                  | EU839358     | 1 - 1431          | [39]                               |
| <i>Rhodobacter</i> sp. LW4                      | FM956479     | 1 - 1445          | Direct submission<br>(09-JAN-2009) |
| <i>Rhodobacter</i> sp. R18                      | AB607872     | 1 - 1430          | [40]                               |
| <i>Rhodobacter sphaeroides</i> 2.4.1            | CP030271     | 1 - 1471          | [68]                               |
| <i>Rhodobacter vinaykumarii</i> JA123           | AM408117     | 1 - 1387          | [42]                               |
| <i>Roseicetium antarcticum</i> ZS2-28           | FJ196006     | 1 - 1429          | [43]                               |
| <i>Vibrio alginolyticus</i> ATCC 33787          | CP013484     | 2195014 - 2196575 | [69]                               |
| <i>Vibrio alginolyticus</i> NBRC 15630          | CP006718     | 1961445 - 1962985 | [70]                               |
| <i>Vibrio atypicus</i> HHS02                    | FJ009624     | 1 - 1401          | [46]                               |
| <i>Vibrio campbellii</i> CAIM 519               | CP015863     | 649525 - 651086   | Direct Submission<br>(25-MAY-2016) |
| <i>Vibrio cholerae</i> CECT 514                 | X76337       | 1 - 1538          | [71]                               |
| <i>Vibrio diabolicus</i> FDAARGOS_105           | CP014036     | 427222 - 428783   | [72]                               |
| <i>Vibrio furnissii</i> ATCC 35016              | X76336       | 1 - 1546          | [71]                               |
| <i>Vibrio harveyi</i> FDAARGOS_107              | CP014038     | 1618778 - 1620338 | [72]                               |
| <i>Vibrio natriegens</i> NBRC 15636             | CP016345     | 2855557 - 2857118 | [73]                               |
| <i>Vibrio parahaemolyticus</i> ATCC 17802       | CP014046     | 900558 - 902118   | [72]                               |
| <i>Vibrio proteolyticus</i> NBRC 13287          | BATJ01000038 | 1 - 1562          | Direct Submission<br>(10-SEP-2013) |
| <i>Vibrio rotiferianus</i> B64D1                | CP018312     | 4099 - 5660       | [54]                               |
| <i>Vibrio tubiashii</i> ATCC 19109              | CP009354     | 47507 - 49071     | [74]                               |
| <i>Vibrio xiamenensis</i> G21                   | GQ397859     | 1 - 1475          | [56]                               |



**Supplementary Table S3.** Genome availability of species in NCBI used for phylogenetic analysis and comparative genomics. Included are the GenBank accession number, assembly level, and representative genome status for a given species.

| Species                                       | GenBank accession number                                                                                                           | Assembly level | Ref. seq. | Reference                          |
|-----------------------------------------------|------------------------------------------------------------------------------------------------------------------------------------|----------------|-----------|------------------------------------|
| <i>Aliivibrio fischeri</i><br>ATCC 7744       | BBEE00000000<br>180 contigs: BBEE01000001-BBEE01000180                                                                             | ◉<br>Contigs   | -         | Direct submission<br>(18-JUN-2014) |
| <i>Anaerobacillus macyae</i><br>DSM 16346     | LELK00000000<br>15 scaffolds: LELK01000001-LELK01000015                                                                            | ●<br>Scaffolds | ✓         | [58]                               |
| <i>Bacillus algalicola</i><br>KMM 3737        | No genome                                                                                                                          | ○<br>No genome | -         | N/A                                |
| <i>Bacillus altitudinis</i><br>41KF2b         | ASJC00000000<br>39 contigs: ASJC01000001-ASJC01000039                                                                              | ◉<br>Contigs   | -         | Direct submission<br>(09-MAY-2013) |
| <i>Bacillus amyloliquefaciens</i><br>DSM 7    | Chr: FN597644                                                                                                                      | ●<br>Complete  | ✓         | [59]                               |
| <i>Bacillus aquimaris</i><br>TF-12            | LQXM00000000<br>30 contigs: LQXM01000001-LQXM01000030                                                                              | ◉<br>Contigs   | ✓         | [75]                               |
| <i>Bacillus atrophaeus</i><br>1942            | Chr: CP002207                                                                                                                      | ●<br>Complete  | -         | [7]                                |
| <i>Bacillus atrophaeus</i><br>JCM9070         | LSBB00000000<br>23 scaffolds: LSBB01000001-LSBB01000023                                                                            | ●<br>Scaffolds | -         | [76]                               |
| <i>Bacillus cereus</i><br>ATCC 14579          | Chr: CP034551;<br>pUnnamed: CP034552                                                                                               | ●<br>Complete  | ✓         | Direct submission<br>(13-DEC-2018) |
| <i>Bacillus cytotoxicus</i><br>NVH 391-98     | Chr: CP000764;<br>pBC9801: CP000765                                                                                                | ●<br>Complete  | ✓         | [77]                               |
| <i>Bacillus firmus</i><br>EN 5C               | No genome                                                                                                                          | ○<br>No genome | -         | N/A                                |
| <i>Bacillus firmus</i><br>NCTC 10335          | UFTC00000000<br>3 contigs: UFTC01000001-UFTC01000003                                                                               | ◉<br>Contigs   | ✓         | Direct submission<br>(06-JUN-2018) |
| <i>Bacillus gottheilii</i><br>WCC 4585        | No genome                                                                                                                          | ○<br>No genome | -         | N/A                                |
| <i>Bacillus hwaajinpoensis</i><br>22506_14_FS | WMEY00000000<br>27 contigs: WMEY01000001-WMEY01000027                                                                              | ◉<br>Contigs   | -         | Direct submission<br>(07-NOV-2019) |
| <i>Bacillus hwaajinpoensis</i><br>Y2          | SWFM00000000<br>25 contigs: SWFM01000001-SWFM01000025                                                                              | ◉<br>Contigs   | ✓         | Direct submission<br>(24-APR-2019) |
| <i>Bacillus infantis</i><br>NRRL B-14911      | Chr: CP006643                                                                                                                      | ●<br>Complete  | ✓         | [63]                               |
| <i>Bacillus krulwichiae</i><br>AM31D          | Chr: CP020814                                                                                                                      | ●<br>Complete  | ✓         | Direct submission<br>(18-APR-2017) |
| <i>Bacillus marisflavi</i><br>TF-11           | LGUE00000000<br>11 scaffolds: LGUE01000001-LGUE01000011                                                                            | ●<br>Scaffolds | ✓         | [78]                               |
| <i>Bacillus marisflavi</i><br>151-25          | Chr: CP047095;<br>p25: CP047096                                                                                                    | ●<br>Complete  | -         | [16]                               |
| <i>Bacillus megaterium</i><br>IAM 13418       | Chr: CP009920; pBMV_1: CP009919;<br>pBMV_2: CP009921; pBMV_3: CP009915;<br>pBMV_4: CP009918; pBMV_5: CP009916;<br>pBMV_6: CP009917 | ●<br>Complete  | ✓         | [79]                               |
| <i>Bacillus oceanisediminis</i><br>H2         | VLKI00000000<br>51 scaffolds: VLKI01000001-VLKI01000051                                                                            | ●<br>Scaffolds | -         | [80]                               |
| <i>Bacillus oceanisediminis</i><br>2691       | Chr: CP015506<br>pBO1: CP015507                                                                                                    | ●<br>Complete  | ✓         | [18]                               |

|                                                    |                                                                                                     |                |   |                                    |
|----------------------------------------------------|-----------------------------------------------------------------------------------------------------|----------------|---|------------------------------------|
| <i>Bacillus oryzaecorticis</i><br>IHB B 17121      | No genome                                                                                           | ○<br>No genome | - | N/A                                |
| <i>Bacillus pseudofirmus</i><br>DSM 8715           | No genome                                                                                           | ○<br>No genome | - | N/A                                |
| <i>Bacillus shackletonii</i><br>LMG 18435          | LJJC00000000.1<br>24 scaffolds: LJJC01000001-LJJC01000024                                           | ●<br>Scaffolds | ✓ | [81]                               |
| <i>Bacillus</i> sp.<br>BW3PhG2                     | Chr: CP046564                                                                                       | ●<br>Complete  | - | [25]                               |
| <i>Bacillus</i> sp.<br>JL-29                       | No genome                                                                                           | ○<br>No genome | - | N/A                                |
| <i>Bacillus</i> sp.<br>MN-003                      | No genome                                                                                           | ○<br>No genome | - | N/A                                |
| <i>Bacillus</i> sp.<br>N1-1                        | No genome                                                                                           | ○<br>No genome | - | N/A                                |
| <i>Bacillus subtilis</i><br>DSM10                  | Chr: CP020102;<br>pBS32: CP020103                                                                   | ●<br>Complete  | - | [82]                               |
| <i>Bacillus thuringiensis</i><br>ATCC 10792        | Chr: CP021061; poh1: CP021062;<br>poh2: CP021063; poh3: CP021064;<br>poh4: CP021065; poh5: CP021066 | ●<br>Complete  | ✓ | [66]                               |
| <i>Bacillus toyonensis</i><br>BCT-7112             | Chr: CP006863; pBCT77: CP006864;<br>pBCT8: CP006865                                                 | ●<br>Complete  | ✓ | [28]                               |
| <i>Bacillus vietnamensis</i><br>151-6              | Chr: CP047394<br>p6: CP047395                                                                       | ●<br>Complete  | - | [16]                               |
| <i>Bacillus vietnamensis</i><br>NBRC 101237        | BCVQ00000000<br>123 contigs: BCVQ01000001-BCVQ01000123                                              | ○<br>Contigs   | ✓ | Direct submission<br>(26-FEB-2016) |
| <i>Bacillus wiedmannii</i><br>FSL W8-0169          | LOBC00000000<br>104 contigs: LOBC01000001-LOBC01000104                                              | ○<br>Contigs   | - | [30]                               |
| <i>Celeribacter baekdonensis</i><br>L-6            | FNBL00000000<br>38 scaffolds: FNBL01000001-FNBL01000038                                             | ●<br>Scaffolds | ✓ | Direct submission<br>(11-OCT-2016) |
| <i>Deftuimonomas alba</i><br>cai42                 | Chr: CP012661; cai42_plasmidA: CP012662;<br>cai42_plasmidB: CP012663;<br>cai42_plasmidC: CP012664   | ●<br>Complete  | ✓ | [67]                               |
| <i>Gemmobacter tilapia</i><br>Ruye-53              | No genome                                                                                           | ○<br>No genome | - | N/A                                |
| <i>Haematobacter massiliensis</i><br>CCUG 47968    | JGYG00000000<br>53 contigs: JGYG01000001-JGYG01000053                                               | ○<br>Contigs   | - | Direct submission<br>(04-MAR-2014) |
| <i>Paracoccus zeaxanthinifaciens</i><br>ATCC 21588 | ATUJ00000000<br>35 contigs: ATUJ01000001-ATUJ01000035                                               | ○<br>Contigs   | ✓ | Direct submission<br>(02-JUL-2013) |
| <i>Pararhodobacter</i> sp.<br>CIC4N-9              | QEYD00000000<br>30 contigs: QEYD01000001-QEYD01000030                                               | ○<br>Contigs   | - | [37]                               |
| <i>Pararhodobacter</i> sp.<br>CCB-MM2              | LRRR00000000<br>136 contigs: LRRR01000001-LRRR01000136                                              | ○<br>Contigs   | - | [36]                               |
| <i>Rhodobacter aestuarii</i><br>JA296              | FTOG00000000<br>31 contigs: NZ_FTOG01000001-<br>NZ_FTOG01000031                                     | ○<br>Contigs   | ✓ | Direct submission<br>(09-JAN-2017) |
| <i>Rhodobacter</i> sp.<br>Bo10-19                  | No genome                                                                                           | ○<br>No genome | - | N/A                                |
| <i>Rhodobacter</i> sp.<br>LW4                      | No genome                                                                                           | ○<br>No genome | - | N/A                                |
| <i>Rhodobacter</i> sp.<br>R18                      | No genome                                                                                           | ○<br>No genome | - | N/A                                |

|                                              |                                                                                                                                                                                                      |                |   |                                    |
|----------------------------------------------|------------------------------------------------------------------------------------------------------------------------------------------------------------------------------------------------------|----------------|---|------------------------------------|
| <i>Rhodobacter sphaeroides</i><br>2.4.1      | Chr1: CP030271; Chr2: CP030272;<br>pA: CP030273; pB: CP030274;<br>pC: CP030275; pDE: CP030276                                                                                                        | ●<br>Complete  | ✓ | [68]                               |
| <i>Rhodobacter vinaykumarii</i><br>JA123     | FTOM00000000<br>27 scaffolds: FTOM01000001-FTOM01000027                                                                                                                                              | ●<br>Scaffolds | ✓ | Direct submission<br>(09-JAN-2017) |
| <i>Roseicetium antarcticum</i><br>ZS2-28     | FNOM00000000<br>77 scaffolds: FNOM01000001-FNOM01000077                                                                                                                                              | ●<br>Scaffolds | ✓ | Direct submission<br>(20-OCT-2016) |
| <i>Vibrio alginolyticus</i><br>ATCC 33787    | Chr1: CP013484; Chr2: CP013485;<br>pMBL96: CP013488; pMBL128: CP013486;<br>pMBL287: CP013487                                                                                                         | ●<br>Complete  | - | [69]                               |
| <i>Vibrio alginolyticus</i><br>NBRC 15630    | Chr1: CP006718;<br>Chr2: CP006719                                                                                                                                                                    | ●<br>Complete  | ✓ | [70]                               |
| <i>Vibrio atypicus</i><br>HHS02              | BLID00000000<br>66 scaffolds: BLID01000001-BLID01000066                                                                                                                                              | ●<br>Scaffolds | ✓ | [83]                               |
| <i>Vibrio campbellii</i><br>CAIM 519         | Chr1: CP015863; Chr2: CP015864;<br>pUnnamend: CP015865                                                                                                                                               | ●<br>Complete  | - | Direct submission<br>(25-MAY-2016) |
| <i>Vibrio cholerae</i><br>CECT 514           | JHXR00000000<br>62 scaffolds: JHXR01000001-JHXR01000004;<br>JHXR01000009-JHXR01000011; JHXR01000014-<br>JHXR01000024; JHXR01000027-JHXR01000034;<br>JHXR01000038-JHXR01000068; KK211322-<br>KK211326 | ●<br>Scaffolds | - | Direct submission<br>(26-MAR-2014) |
| <i>Vibrio diabolis</i><br>FDAARGOS_105       | Chr1: CP014036;<br>Chr2: CP014037                                                                                                                                                                    | ●<br>Complete  | ✓ | [72]                               |
| <i>Vibrio furnissii</i><br>ATCC 35016        | Chr1: CP040990; Chr2: CP040991;<br>pUnnamend1: CP040989                                                                                                                                              | ●<br>Complete  | ✓ | [72]                               |
| <i>Vibrio harveyi</i><br>FDAARGOS_107        | Chr1: CP014038.2;<br>Chr2: CP014039.2                                                                                                                                                                | ●<br>Complete  | ✓ | [72]                               |
| <i>Vibrio natriegens</i><br>NBRC 15636       | Chr1: CP016345;<br>Chr2: CP016346                                                                                                                                                                    | ●<br>Complete  | - | [73]                               |
| <i>Vibrio parahaemolyticus</i><br>ATCC 17802 | Chr1: CP014046;<br>Chr2: CP014047                                                                                                                                                                    | ●<br>Complete  | ✓ | [72]                               |
| <i>Vibrio proteolyticus</i><br>NBRC 13287    | BATJ01000000<br>50 contigs: BATJ01000001-BATJ01000050                                                                                                                                                | ●<br>Contigs   | ✓ | Direct submission<br>(10-SEP-2013) |
| <i>Vibrio rotiferianus</i><br>B64D1          | Chr1: CP018311;<br>Chr2: CP018312                                                                                                                                                                    | ●<br>Complete  | ✓ | [54]                               |
| <i>Vibrio tubiashii</i><br>ATCC 19109        | Chr1: CP009354; Chr2: CP009355;<br>p48: CP009359; p57: CP009358<br>p123: CP009357; p251: CP009356                                                                                                    | ●<br>Complete  | ✓ | [74]                               |
| <i>Vibrio xiamenensis</i><br>G21             | FNDD00000000<br>82 scaffolds: FNDD01000001-FNDD01000082                                                                                                                                              | ●<br>Scaffolds | ✓ | Direct submission<br>(12-OCT-2016) |

**Supplementary Table S4.** Properties of the genomes used for the *Bacillaceae* comparative genomics analysis with Anvi'o. NTK strains are marked with a (◀).

| Species                                   | Number<br>gene clusters | Singleton<br>gene clusters | Completion<br>(%) | GC-content | Total length (bp) |
|-------------------------------------------|-------------------------|----------------------------|-------------------|------------|-------------------|
| <i>Bacillus</i> sp. NTK034 ◀              | 5617                    | 838                        | 100               | 0.409657   | 5599963           |
| <i>Bacillus oceanisediminis</i> 2691      | 5850                    | 1089                       | 100               | 0.408836   | 5848607           |
| <i>Bacillus oceanisediminis</i> H2        | 5590                    | 1343                       | 100               | 0.408821   | 5634660           |
| <i>Bacillus infantis</i> NRRL B-14911     | 5031                    | 1622                       | 98.59             | 0.460333   | 4884713           |
| <i>Bacillus firmus</i> NCTC 10335         | 4541                    | 599                        | 100               | 0.417216   | 4803910           |
| <i>Bacillus vietnamensis</i> NBRC 101237  | 4538                    | 366                        | 100               | 0.437364   | 4410879           |
| <i>Bacillus vietnamensis</i> 151-6        | 4694                    | 542                        | 100               | 0.436474   | 4597807           |
| <i>Bacillus</i> sp. NTK074B ◀             | 4668                    | 846                        | 100               | 0.435474   | 4250699           |
| <i>Bacillus aquimaris</i> TF-12           | 3862                    | 690                        | 100               | 0.373054   | 4035445           |
| <i>Bacillus marisflavi</i> TF-11          | 4390                    | 1170                       | 100               | 0.485657   | 4312088           |
| <i>Bacillus</i> sp. NTK071 ◀              | 4136                    | 344                        | 100               | 0.398513   | 4164462           |
| <i>Bacillus hwajinpoensis</i> Y2          | 4020                    | 242                        | 100               | 0.397388   | 4091520           |
| <i>Anaerobacillus macyae</i> DSM 16346    | 4149                    | 315                        | 100               | 0.398453   | 4256776           |
| <i>Bacillus</i> sp. N1-1                  | 4389                    | 332                        | 100               | 0.404822   | 4497340           |
| <i>Bacillus hwajinpoensis</i> 22506_14_FS | 4415                    | 355                        | 100               | 0.402183   | 4362982           |

**Supplementary Table S5.** Pangenomic analysis properties of the *Rhodobacteraceae* genomes that were compared with NTK community NTK016B (◀).

| Species                               | Number<br>gene clusters | Singleton<br>gene clusters | Completion<br>(%) | GC-content | Total length (bp) |
|---------------------------------------|-------------------------|----------------------------|-------------------|------------|-------------------|
| <i>Rhodobacter sphaeroides</i> 2.4.1  | 4361                    | 2074                       | 100               | 0.687717   | 4629754           |
| <i>Defluviimonas alba</i> cai42       | 4770                    | 2257                       | 100               | 0.665331   | 4987611           |
| <i>Roseicetium antarcticum</i> ZS2-28 | 4046                    | 1845                       | 100               | 0.631032   | 4250016           |
| <i>Rhodobacter</i> sp. NTK016B ◀      | 4644                    | 790                        | 100               | 0.653535   | 4854159           |
| <i>Pararhodobacter</i> sp. CIC4N-9    | 4299                    | 499                        | 100               | 0.667462   | 4486134           |
| <i>Pararhodobacter</i> sp. CCB-MM2    | 4813                    | 1431                       | 100               | 0.659524   | 5149122           |

**Supplementary Table S6.** Properties of genomes used for the *Vibrionaceae* pangenomic analysis with the NTK community strains (◀).

| Species                                   | Number<br>gene clusters | Singleton<br>gene clusters | Completion<br>(%) | GC-content | Total length (bp) |
|-------------------------------------------|-------------------------|----------------------------|-------------------|------------|-------------------|
| <i>Vibrio furnissii</i> ATCC 35016        | 4544                    | 1044                       | 100               | 0.505984   | 4993326           |
| <i>Vibrio proteolyticus</i> NBRC 13287 ◀  | 4342                    | 747                        | 100               | 0.500146   | 4745539           |
| <i>Vibrio tubiashii</i> ATCC 19109        | 4979                    | 1210                       | 100               | 0.450052   | 5540337           |
| <i>Vibrio atypicus</i> HHS02              | 4303                    | 685                        | 100               | 0.438952   | 4835723           |
| <i>Vibrio parahaemolyticus</i> ATCC 17802 | 4557                    | 340                        | 100               | 0.45330    | 5152461           |
| <i>Vibrio diabolis</i> FDAARGOS_105       | 4834                    | 489                        | 100               | 0.44815    | 5426154           |
| <i>Vibrio alginolyticus</i> NBRC 15630    | 4506                    | 142                        | 100               | 0.446793   | 5146637           |
| <i>Vibrio alginolyticus</i> ATCC 33787 ◀  | 5174                    | 778                        | 100               | 0.445122   | 5724939           |
| <i>Vibrio natriegens</i> NBRC 15636       | 4500                    | 811                        | 100               | 0.450796   | 5168686           |
| <i>Vibrio rotiferianus</i> B64D1          | 4602                    | 443                        | 100               | 0.448405   | 5277859           |
| <i>Vibrio harveyi</i> FDAARGOS_107        | 5332                    | 745                        | 100               | 0.449027   | 6038929           |
| <i>Vibrio campbellii</i> CAIM 519         | 4667                    | 624                        | 100               | 0.450805   | 5178103           |

**Supplementary Table S7.** Amino acid sequences of the extracellular PHA depolymerase candidates.

| Species                                   | Annotated<br>protein<br>name        | Amino acid sequence                                                                                                                                                                                                                                                                                                                                                                                                                                                                                                                |
|-------------------------------------------|-------------------------------------|------------------------------------------------------------------------------------------------------------------------------------------------------------------------------------------------------------------------------------------------------------------------------------------------------------------------------------------------------------------------------------------------------------------------------------------------------------------------------------------------------------------------------------|
| <i>Bacillus</i> sp.<br>NTK074B            | Hypothetical<br>protein             | MIKKISMTVLALFLLPSWSHAGSWTKDPSGVPQWYVGTTPSSVAPSKQPILFVHGLN<br>SSSNTWWNDNNMYDTAYQNGYETAFIGDLYPTRNMWDNGTLLSQKIRDIYNYGKQV<br>VIVAHSKGGIDVQSALVHYGAYPYVSRVITLSTPHYGSQLADLAYSSWAGWLAGILGSK<br>NEATYSLQTGYMSYFREEDQANAVTKVPFYTFGGTKWGSFSSLYWGGLYLSGYGSN<br>DGAVTVNSSRLPYATELVGGWNHYTIKESSTFNLFKGYLNETTNNSSGAVTQSASF<br>NNDADSFRRGGGYSGETQEKILVEEGARSVTFDWMSSSPSSRLVLKDPKKNKYSSFDVS<br>KDNSDYFNAGYHHTLTINTPNPGEWTLSEASQSTETLLNVSFDSIMNNAVSMSEQD<br>QISLKKKSDSVSIQQDMTIEYYKNGKLEKSKLKSNGLLKLPSSLGEGVYNVTIDIKGKKG<br>KNAFNRTLIKTIYVDDKGRIFGE |
| <i>Vibrio alginolyticus</i><br>ATCC 33787 | Lipase<br>precursor<br>(EC 3.1.1.3) | MKLKFIALLMLFTLVTPITSVSAATGYTQTKYPIVLVHGLFGFDLAGVDYFFGIPHSLT<br>KDGATVYVAQVSATNSSEVRGEQLLAQVETLLAATGAEKVNLIHSHGGPTTRYVASV<br>RPDLVASVTSIGGVNKGSKVADLVRGTVSEGSSEQLAVKLAQGLTTLINLLSGGSDLD<br>QDPLASLATLTTEGSLAFNQHYPEGVPTSECGNDLLASNGVYYYSWTGSSTFTNVFDP<br>TDAAMMVLGLAFDGPNDGLVGACSTHLGKVIRDDYQMNHLDEINGLLGIHHLFETD<br>PVTLYRQHARLKLQGL                                                                                                                                                                                               |
| <i>Vibrio proteolyticus</i><br>NBRC 13287 | Lipase<br>precursor<br>(EC 3.1.1.3) | MKLYLVALCLFSPFVLASTASALDNTGYTQTRYPIVLVHGLFGFDLAGVDYFYSIPHS<br>LTKDGASVYVAQVSATNSSELRGEQLLSQVEMLLAATGAEKVNLIHSHGGPTARYV<br>ASVRPDLVASVTSVGGVNKGSKVADLVRGAVADGSAGEAIAVKLAEGLVTLINLLSGG<br>SDLEQDPLASLAALTTEGSLAFNQHYPEGVPTSECGDGEFLADNGVYYYSWTGSSTFTN<br>LLDPTDAAMTILGLAFDGPNDGLVGACSTHLGKVIRDDYQMNHLDEINGLLGVHHLF<br>ETDPVTLYRQHARLKLQGL                                                                                                                                                                                            |

**Supplementary Table S8.** Positions of conserved sites in known extracellular PHA depolymerases and closely related lipases, with candidate extracellular PhaZs (◀). Proteins with experimentally validated positions are marked bold. If no experimental evidence was published on the proteins, signal peptides were predicted by SignalP and conserved sites were aligned visually with the validated proteins.

| Protein                       | NCBI Protein Accession | Species                                       | Signal peptide | Oxyanion hole | Lipase box     | Catalytic triad (S-H-A) | Reference                       |
|-------------------------------|------------------------|-----------------------------------------------|----------------|---------------|----------------|-------------------------|---------------------------------|
| Hypothetical protein ▶        | MBN8191285             | <i>Bacillus</i> sp. NTK074B                   | 1-22           | 57-57         | 119-123        | 121-223-256             | This study                      |
| Hypothetical protein sed_3530 | ABV38134               | <i>Shewanella sediminis</i> HAW-EB3           | 1-23           | 67-73         | 160-164        | 162-269-331             | [84]                            |
| <b>Lipase A</b>               | <b>P37957</b>          | <b><i>Bacillus subtilis</i> strain 168</b>    | <b>1-31</b>    | <b>36-42</b>  | <b>106-110</b> | <b>108-164-187</b>      | [85]                            |
| Lipase class 2                | ABZ77296               | <i>Shewanella halifaxensis</i> HAW-EB4        | 1-23           | 67-73         | 160-164        | 162-269-331             | [84]                            |
| Lipase precursor ▶            | ALR91050               | <i>Vibrio alginolyticus</i> ATCC 33787        | 1-23           | 33-39         | 104-108        | 106-253-275             | Direct Submission (08-DEC-2015) |
| Lipase precursor ▶            | GAD66740               | <i>Vibrio proteolyticus</i> NBRC 13287        | 1-23           | 35-41         | 106-110        | 108-255-277             | Direct submission (10-SEP-2013) |
| <b>PhaZ7</b>                  | <b>Q939Q9</b>          | <b><i>Paucimonas lemoignei</i></b>            | <b>1-38</b>    | <b>80-86</b>  | <b>172-176</b> | <b>174-280-344</b>      | [86-88]                         |
| <b>Thermostable lipase</b>    | <b>Q842J9</b>          | <b><i>Geobacillus zalihae</i> T1</b>          | <b>1-28</b>    | <b>37-43</b>  | <b>139-143</b> | <b>141-345-386</b>      | [89,90]                         |
| Triacylglycerol lipase        | WP_005101273           | <i>Acinetobacter</i> multispecies             | 1-29           | 50-56         | 125-129        | 127-280-302             | [91]                            |
| Triacylglycerol lipase        | WP_005101276           | <i>Acinetobacter</i> multispecies             | 1-23           | 44-50         | 120-124        | 122-267-289             | [91]                            |
| Triacylglycerol lipase        | WP_064094572           | <i>Acinetobacter</i> multispecies             | 1 - 21         | 42-48         | 117-121        | 119-266-288             | [91]                            |
| <b>Triacylglycerol lipase</b> | <b>P22088</b>          | <b><i>Burkholderia cepacia</i> ATCC 21808</b> | <b>1-44</b>    | <b>54-60</b>  | <b>129-133</b> | <b>131-308-330</b>      | [92,93]                         |
| <b>Triacylglycerol lipase</b> | <b>Q05489</b>          | <b><i>Burkholderia glumae</i> ATCC 6918</b>   | <b>1-39</b>    | <b>49-55</b>  | <b>124-128</b> | <b>126-302-324</b>      | [94,95]                         |
| <b>Triacylglycerol lipase</b> | <b>P26876</b>          | <b><i>Pseudomonas aeruginosa</i> PAO1</b>     | <b>1-26</b>    | <b>35-41</b>  | <b>106-110</b> | <b>108-255-277</b>      | [96,97]                         |

## References

- Robertson, L.A.; Figge, M.J.; Dunlap, P.V. Beijerinck and the bioluminescent bacteria: Microbiological experiments in the late 19th and early 20th centuries. *FEMS Microbiol. Ecol.* **2011**, *75*, 185–194, doi:10.1111/j.1574-6941.2010.01004.x.
- Santini, J.M.; Stolz, J.F.; Macy, J.M. Isolation of a new arsenate-respiring bacterium—Physiological and phylogenetic Studies. *Geomicrobiol. J.* **2002**, *19*, 41–52, doi:10.1080/014904502317246156.
- Ivanova, E.P.; Alexeeva, Y.A.; Zhukova, N.V.; Gorshkova, N.M. *Bacillus algicola* sp. nov., a novel filamentous organism isolated from brown alga *Fucus evanescens*. *Syst. Appl. Microbiol.* **2004**, *27*, 301, doi:10.1078/0723-2020-00269.
- Shivaji, S.; Chaturvedi, P.; Suresh, K. *Bacillus aerius* sp. nov., *Bacillus aerophilus* sp. nov., *Bacillus stratosphericus* sp. nov. and *Bacillus altitudinis* sp. nov., isolated from cryogenic tubes used for collecting air samples from high altitudes. *Int. J. Syst. Evol. Microbiol.* **2006**, *56*, 1465–1473 doi:10.1099/ijs.0.64029-0.
- Fukumoto, J. Studies on the production of bacterial amylase. I. Isolation of bacteria secreting potent amylases and their distribution. *Nippon Nogeikagaku Kaishi* **1943**, *19*, 487–503.
- Yoon, J.-H.; Kim, I.-G.; Kang, K.H.; Oh, T.-K.; Park, Y.-H. *Bacillus marisflavi* sp. nov. and *Bacillus aquimaris* sp. nov., isolated from sea water of a tidal flat of the Yellow Sea in Korea. *J. Med. Microbiol.* **2003**, *53*, 1297–1303, doi:10.1099/ijs.0.02365-0.
- Gibbons, H.S.; Broomall, S.M.; McNew, L.A.; Daligault, H.; Chapman, C.; Bruce, D.; Karavis, M.; Krepps, M.; McGregor, P.A.; Hong, C. Genomic signatures of strain selection and enhancement in *Bacillus atrophaeus* var. *globigii*, a historical biowarfare simulant. *PLoS ONE* **2011**, *6*, e17836, doi:10.1371/journal.pone.0017836.
- Nakamura, L. Taxonomic relationship of black-pigmented *Bacillus subtilis* strains and a proposal for *Bacillus atrophaeus* sp. nov. *Int. J. Syst. Evol. Microbiol.* **1989**, *39*, 295–300, doi:10.1099/00207713-39-3-295.
- Frankland, G.C.; Frankland, P.F. XI. Studies on some new micro-organisms obtained from air. *Philos. Trans. R. Soc. Lond.* **1887**, 257–287, doi:10.1098/rstb.1887.0011.
- Lund, T.; De Buyser, M.L.; Granum, P.E. A new cytotoxin from *Bacillus cereus* that may cause necrotic enteritis. *Mol. Biotechnol.* **2000**, *38*, 254–261, doi:10.1046/j.1365-2958.2000.02147.x.
- Balakrishnan, S.L.; Rao, P.P. Monocrotophos Degradation Potential of Bacterial Isolates Isolated from Agricultural Soils of Visakhapatnam Dist. *J. Pure Appl. Microbiol.* **2019**, *13*, 393–402, doi:10.22207/JPAM.13.1.43.
- Werner, W.E.G. *Botanische Beschreibung Häufiger am Buttersäureabbau Beteiligter Sporenbildender Bakterienspezies*; Gustav Fischer Verlag: Jena, Germany, 1933; Volume 87.
- Seiler, H.; Wenning, M.; Schmidt, V.; Scherer, S. *Bacillus gottheilii* sp. nov., isolated from a pharmaceutical manufacturing site. *Int. J. Syst. Evol. Microbiol.* **2013**, *63*, 867–872, doi:10.1099/ijs.0.036277-0.
- Siefert, J.L.; Larios-Sanz, M.; Nakamura, L.K.; Slepecky, R.A.; Paul, J.H.; Moore, E.R.; Fox, G.E.; Jurtshuk Jr, P. Phylogeny of marine *Bacillus* isolates from the Gulf of Mexico. *Curr. Microbiol.* **2000**, *41*, 84–88, doi:10.1007/s002840010098.
- Yumoto, I.; Yamaga, S.; Sogabe, Y.; Nodasaka, Y.; Matsuyama, H.; Nakajima, K.; Suemori, A. *Bacillus krulwichiae* sp. nov., a halotolerant obligate alkaliphile that utilizes benzoate and m-hydroxybenzoate. *J. Med. Microbiol.* **2003**, *53*, 1531–1536, doi:10.1099/ijs.0.02596-0.
- Yu, X.; Ding, Z.; Ji, Y.; Zhao, J.; Liu, X.; Tian, J.; Wu, N.; Fan, Y. An operon consisting of a P-type ATPase gene and a transcriptional regulator gene responsible for cadmium resistances in *Bacillus vietnamensis* 151–6 and *Bacillus marisflavi* 151–25. *BMC Microbiol.* **2020**, *20*, 18, doi:10.1186/s12866-020-1705-2.
- de Bary, A. *Vergleichende Morphologie und Biologie der Pilze, Mycetozoen und Bakterien*; Wilhelm Engelmann: Leipzig, Germany, 1884.
- Jung, J.; Jeong, H.; Kim, H.J.; Lee, D.-W.; Lee, S.J. Complete genome sequence of *Bacillus oceanisediminis* 2691, a reservoir of heavy-metal resistance genes. *Mar. Genome* **2016**, *30*, 73–76, doi:10.1016/j.margen.2016.07.002.
- Zhang, J.; Wang, J.; Fang, C.; Song, F.; Xin, Y.; Qu, L.; Ding, K. *Bacillus oceanisediminis* sp. nov., isolated from marine sediment. *Int. J. Syst. Evol. Microbiol.* **2010**, *60*, 2924–2929, doi:10.1099/ijs.0.019851-0.
- Nielsen, P.; Fritze, D.; Priest, F.G. Phenetic diversity of alkaliphilic *Bacillus* strains: Proposal for nine new species. *Microbiology* **1995**, *141*, 1745–1761, doi:10.1099/13500872-141-7-1745.
- Logan, N.; Lebbe, L.; Hoste, B.; Goris, J.; Forsyth, G.; Heyndrickx, M.; Murray, B.; Syme, N.; Wynn-Williams, D.; De Vos, P. Aerobic endospore-forming bacteria from geothermal environments in northern Victoria Land, Antarctica, and Candlemas Island, South Sandwich archipelago, with the proposal of *Bacillus fumarioli* sp. nov. *Int. J. Syst. Evol. Microbiol.* **2000**, *50*, 1741–1753, doi:10.1099/00207713-50-5-1741.
- Shen, M.; Yang, R.; Luo, Q.; Wang, S.; Ren, J. Microbial diversity of *Pyropia haitanensis* phycosphere during cultivation. *Wei Sheng Wu Xue Bao* **2013**, *53*, 1087–1102.

23. Du, H.; Jiao, N.; Hu, Y.; Zeng, Y. Diversity and distribution of pigmented heterotrophic bacteria in marine environments. *FEMS Microbiol. Ecol.* **2006**, *57*, 92–105, doi:10.1111/j.1574-6941.2006.00090.x.
24. Zhuang, W.-Q.; Tay, J.-H.; Maszenan, A.; Tay, S. *Bacillus naphthovorans* sp. nov. from oil-contaminated tropical marine sediments and its role in naphthalene biodegradation. *Appl. Microbiol. Biotechnol.* **2002**, *58*, 547–554, doi:10.1007/s00253-001-0909-0.
25. Wang, K.; Zhao, Y.; Wang, X.; Qu, C.; Miao, J. Complete genome sequence of *Bacillus* sp. N1-1, a  $\kappa$ -selenocarrageenan degrading bacterium isolated from the cold seep in the South China Sea. *Mar. Genome* **2020**, 100771, doi:10.1016/j.margen.2020.100771.
26. Conn, H.J. The identity of *Bacillus subtilis*. *J. Infect. Dis.* **1930**, *46*, 341–350.
27. Berliner, E. Über die Schlaffsucht der Mehlmotterraupe (*Ephestia kühniella* Zell.) und ihren Erreger *Bacillus thuringiensis* n. sp. *Z. Angew. Entomol.* **1915**, *2*, 29–56, doi:10.1111/j.1439-0418.1915.tb00334.x.
28. Jiménez, G.; Blanch, A.R.; Tamames, J.; Rosselló-Mora, R. Complete genome sequence of *Bacillus toyonensis* BCT-7112<sup>T</sup>, the active ingredient of the feed additive preparation Toyocerin. *Genome Announc.* **2013**, *1*, doi:10.1128/genomeA.01080-13.
29. Noguchi, H.; Uchino, M.; Shida, O.; Takano, K.; Nakamura, L.K.; Komagata, K. *Bacillus vietnamensis* sp. nov., a moderately halotolerant, aerobic, endospore-forming bacterium isolated from Vietnamese fish sauce. *Int. J. Syst. Evol. Microbiol.* **2004**, *54*, 2117–2120, doi:10.1099/ijs.0.02895-0.
30. Miller, R.A.; Beno, S.M.; Kent, D.J.; Carroll, L.M.; Martin, N.H.; Boor, K.J.; Kovac, J. *Bacillus wiedmannii* sp. nov., a psychrotolerant and cytotoxic *Bacillus cereus* group species isolated from dairy foods and dairy environments. *Int. J. Syst. Evol. Microbiol.* **2016**, *66*, 4744, doi:10.1099/ijsem.0.001421.
31. Lee, S.-Y.; Park, S.; Oh, T.-K.; Yoon, J.-H. *Celeribacter baekdonensis* sp. nov., isolated from seawater, and emended description of the genus *Celeribacter* Ivanova et al. 2010. *Int. J. Syst. Evol. Microbiol.* **2012**, *62*, 1359–1364, doi:10.1099/ijs.0.032227-0.
32. Pan, X.-C.; Geng, S.; Lv, X.-L.; Mei, R.; Jiangyang, J.-H.; Wang, Y.-N.; Xu, L.; Liu, X.-Y.; Tang, Y.-Q.; Wang, G.-J.; et al. *Defluviimonas alba* sp. nov., isolated from an oilfield. *Int. J. Syst. Evol. Microbiol.* **2015**, *65*, 1805–1811, doi:10.1099/ijs.0.000181.
33. Sheu, S.-Y.; Sheu, D.-S.; Sheu, F.-S.; Chen, W.-M. *Gemmobacter tilapia* sp. nov., a poly- $\beta$ -hydroxybutyrate-accumulating bacterium isolated from a freshwater pond. *Int. J. Syst. Evol. Microbiol.* **2013**, *63*, 1550–1556, doi:10.1099/ijs.0.044735-0.
34. Greub, G.; Raoult, D. *Rhodobacter massiliensis* sp. nov., a new amoebae-resistant species isolated from the nose of a patient. *Res. Microbiol.* **2003**, *154*, 631–635, doi:10.1016/j.resmic.2003.08.002.
35. Berry, A.; Janssens, D.; Hümbelin, M.; Jore, J.P.; Hoste, B.; Cleenwerck, I.; Vancanneyt, M.; Bretzel, W.; Mayer, A.F.; Lopez-Ulibarri, R. *Paracoccus zeaxanthinifaciens* sp. nov., a zeaxanthin-producing bacterium. *Int. J. Syst. Evol. Microbiol.* **2003**, *53*, 231–238, doi:10.1099/ijs.0.02368-0.
36. Sam, K.-K.; Lau, N.-S.; Furusawa, G.; Amirul, A.-A.A. Draft genome sequence of the halophilic *Pararhodobacter*-like strain CCB-MM2, which has polyhydroxyalkanoate-synthesizing potential. *Microbiol. Resour. Announc.* **2019**, *8*, doi:10.1128/genomeA.01500-14.
37. Lai, Q.; Liu, X.; Yuan, J.; Xie, S.; Shao, Z. *Pararhodobacter marinus* sp. nov., isolated from deep-sea water of the Indian Ocean. *Int. J. Syst. Evol. Microbiol.* **2019**, *69*, 932–936, doi:10.1099/ijsem.0.003219.
38. Ramana, V.V.; Kumar, P.A.; Srinivas, T.; Sasikala, C.; Ramana, C.V. *Rhodobacter aestuarii* sp. nov., a phototrophic alphaproteobacterium isolated from an estuarine environment. *Int. J. Syst. Evol. Microbiol.* **2009**, *59*, 1133–1136, doi:10.1099/ijs.0.004507-0.
39. Hube, A.E.; Heyduck-Söller, B.; Fischer, U. Phylogenetic classification of heterotrophic bacteria associated with filamentous marine cyanobacteria in culture. *Syst. Appl. Microbiol.* **2009**, *32*, 256–265, doi:10.1016/j.syapm.2009.03.001.
40. Sharifah, E.N.; Eguchi, M. The phytoplankton *Nannochloropsis oculata* enhances the ability of *Roseobacter* clade bacteria to inhibit the growth of fish pathogen *Vibrio anguillarum*. *PloS ONE* **2011**, *6*, doi:10.1371/journal.pone.0026756.
41. van Niel, C.B. The culture, general physiology, morphology, and classification of the non-sulfur purple and brown bacteria. *Bacteriol. Rev.* **1944**, *8*, 1–118.
42. Srinivas, T.; Kumar, P.A.; Sasikala, C.; Ramana, C.V.; Imhoff, J.F. *Rhodobacter vinaykumarii* sp. nov., a marine phototrophic alphaproteobacterium from tidal waters, and emended description of the genus *Rhodobacter*. *Int. J. Syst. Evol. Microbiol.* **2007**, *57*, 1984–1987, doi:10.1099/ijs.0.65077-0.
43. Yu, Y.; Yan, S.-L.; Li, H.-R.; Zhang, X.-H. *Roseicitreum antarcticum* gen. nov., sp. nov., an aerobic bacteriochlorophyll *a*-containing alphaproteobacterium isolated from Antarctic sandy intertidal sediment. *Int. J. Syst. Evol. Microbiol.* **2011**, *61*, 2173–2179, doi:10.1099/ijs.0.024885-0.
44. Baumann, P.; Baumann, L.; Mandel, M. Taxonomy of marine bacteria: The genus *Beneckeia*. *J. Bacteriol.* **1971**, *107*, 268–294.



45. Miyamoto, Y.; Nakamura, K.; Takizawa, K. Pathogenic halophiles. Proposals of a new genus "*Oceanomonas*" and of the amended species names. *Jpn. J. Microbiol.* **1961**, *5*, 477–481, doi:10.1111/j.1348-0421.1961.tb00225.x.
46. Wang, Y.; Zhang, X.-H.; Yu, M.; Wang, H.; Austin, B. *Vibrio atypicus* sp. nov., isolated from the digestive tract of the Chinese prawn (*Penaeus chinensis* O'sbeck). *Int. J. Syst. Evol. Microbiol.* **2010**, *60*, 2517–2523, doi:10.1099/ijs.0.016915-0.
47. Hugh, R. The proposed conservation of the generic name *Vibrio* pacini 1854 and designation of the neotype strain of *Vibrio cholerae* Pacini 1854. *Int. J. Syst. Evol. Microbiol.* **1964**, *14*, 87–101, doi:10.1099/0096266X-14-2-87.
48. Lee, J.; Shread, P.; Furniss, A.; Bryant, T. Taxonomy and description of *Vibrio fluvialis* sp. nov. (synonym group F vibrios, group EF6). *J. Appl. Microbiol.* **1981**, *50*, 73–94, doi:10.1111/j.1365-2672.1981.tb00873.x.
49. Brenner, D.; Hickman-Brenner, F.; Lee, J.; Steigerwalt, A.; Fanning, G.; Hollis, D.; Farmer, J.; Weaver, R.; Joseph, S.; Seidler, R. *Vibrio furnissii* (formerly aerogenic biogroup of *Vibrio fluvialis*), a new species isolated from human feces and the environment. *J. Clin. Microbiol.* **1983**, *18*, 816–824.
50. Pedersen, K.; Verdonck, L.; Austin, B.; Austin, D.A.; Blanch, A.R.; Grimont, P.A.; Jofre, J.; Koblavi, S.; Larsen, J.L.; Tiainen, T. Taxonomic evidence that *Vibrio carchariae* Grimes et al. 1985 is a junior synonym of *Vibrio harveyi* (Johnson and Shunk 1936) Baumann et al. 1981. *Int. J. Syst. Evol. Microbiol.* **1998**, *48*, 749–758, doi:10.1099/00207713-48-3-749.
51. Payne, W.J. Studies on bacterial utilization of uronic acids III.: Induction of oxidative enzymes in a marine isolate. *J. Bacteriol.* **1958**, *76*, 301.
52. Fujino, T. Bacterial food poisoning. *Saishin Igaku* **1951**, *6*, 263–271.
53. Merkel, J.R.; Traganza, E.D.; Mukherjee, B.B.; Griffin, T.B.; Prescott, J. Proteolytic activity and general characteristics of a marine bacterium, *Aeromonas proteolytica* sp. N. *J. Bacteriol.* **1964**, *87*, 1227–1233.
54. Lin, H.; Yu, M.; Wang, X.; Zhang, X.-H. Comparative genomic analysis reveals the evolution and environmental adaptation strategies of vibrios. *BMC Genome* **2018**, *19*, 135, doi:10.1186/s12864-018-4531-2.
55. Tubiash, H.S.; Chanley, P.E.; Leifson, E. Bacillary necrosis, a disease of larval and juvenile bivalve mollusks I. Etiology and epizootiology. *J. Bacteriol.* **1965**, *90*, 1036–1044.
56. Gao, Z.; Ruan, L.; Chen, X.; Zhang, Y.; Xu, X. A novel salt-tolerant endo- $\beta$ -1, 4-glucanase Cel5A in *Vibrio* sp. G21 isolated from mangrove soil. *Appl. Microbiol. Biotechnol.* **2010**, *87*, 1373–1382, doi:10.1007/s00253-010-2554-y.
57. Ruimy, R.; Breittmayer, V.; Elbaze, P.; Lafay, B.; Boussemart, O.; Gauthier, M.; Christen, R. Phylogenetic analysis and assessment of the genera *Vibrio*, *Photobacterium*, *Aeromonas*, and *Plesiomonas* deduced from small-subunit rRNA sequences. *Int. J. Syst. Evol. Microbiol.* **1994**, *44*, 416–426, doi:10.1099/00207713-44-3-416.
58. Wang, J.-p.; Liu, B.; Liu, G.-h.; Ge, C.-b.; Chen, Q.-q.; Zhu, Y.-j.; Chen, Z. Genome sequence of *Anaerobacillus macyae* JMM-4<sup>T</sup> (DSM 16346), the first genomic information of the newly established genus *Anaerobacillus*. *Genome Announc.* **2015**, *3*, doi:10.1128/genomeA.00922-15.
59. Borriss, R.; Chen, X.-H.; Rueckert, C.; Blom, J.; Becker, A.; Baumgarth, B.; Fan, B.; Pukall, R.; Schumann, P.; Spröer, C. Relationship of *Bacillus amyloliquefaciens* clades associated with strains DSM 7<sup>T</sup> and FZB42<sup>T</sup>: A proposal for *Bacillus amyloliquefaciens* subsp. *amyloliquefaciens* subsp. nov. and *Bacillus amyloliquefaciens* subsp. *plantarum* subsp. nov. based on complete genome sequence comparisons. *Int. J. Syst. Evol. Microbiol.* **2011**, *61*, 1786–1801, doi:10.1099/ijs.0.023267-0.
60. Goto, K.; Omura, T.; Hara, Y.; Sadaie, Y. Application of the partial 16S rDNA sequence as an index for rapid identification of species in the genus *Bacillus*. *J. Gen. Appl. Microbiol.* **2000**, *46*, 1–8, doi:10.2323/jgam.46.1.
61. Ivanova, N.; Sorokin, A.; Anderson, I.; Galleron, N.; Candelon, B.; Kapatral, V.; Bhattacharyya, A.; Reznik, G.; Mikhailova, N.; Lapidus, A. Genome sequence of *Bacillus cereus* and comparative analysis with *Bacillus anthracis*. *Nature* **2003**, *423*, 87–91, doi:10.1038/nature01582.
62. Guinebretière, M.H.; Thompson, F.L.; Sorokin, A.; Normand, P.; Dawyndt, P.; Ehling - Schulz, M.; Svensson, B.; Sanchis, V.; Nguyen - The, C.; Heyndrickx, M. Ecological diversification in the *Bacillus cereus* group. *Environ. Microbiol.* **2008**, *10*, 851–865, doi:10.1111/j.1462-2920.2007.01495.x.
63. Massilamany, C.; Mohammed, A.; Loy, J.D.; Purvis, T.; Krishnan, B.; Basavalingappa, R.H.; Kelley, C.M.; Guda, C.; Barletta, R.G.; Moriyama, E.N. Whole genomic sequence analysis of *Bacillus infantis*: Defining the genetic blueprint of strain NRRL B-14911, an emerging cardiopathogenic microbe. *BMC Genome* **2016**, *17*, 511, doi:10.1186/s12864-016-2900-2.
64. Suzuki, T.; Yamasato, K. Phylogeny of spore-forming lactic acid bacteria based on 16S rRNA gene sequences. *FEMS Microbiol. Lett.* **1994**, *115*, 13–17, doi:10.1111/j.1574-6968.1994.tb06607.x.
65. Nielsen, P.; Rainey, F.A.; Outtrup, H.; Priest, F.G.; Fritze, D. Comparative 16S rDNA sequence analysis of some alkaliphilic bacilli and the establishment of a sixth rRNA group within the genus *Bacillus*. *FEMS Microbiol. Lett.* **1994**, *117*, 61–65, doi:10.1111/j.1574-6968.1994.tb06736.x.

66. Chelliah, R.; Wei, S.; Park, B.-J.; Rubab, M.; Dalirri, E.B.-M.; Barathikannan, K.; Jin, Y.-G.; Oh, D.-H. Whole genome sequence of *Bacillus thuringiensis* ATCC 10792 and improved discrimination of *Bacillus thuringiensis* from *Bacillus cereus* group based on novel biomarkers. *Microb. Pathog.* **2019**, *129*, 284–297, doi:10.1016/j.micpath.2019.02.014.
67. Zhao, J.-Y.; Geng, S.; Xu, L.; Hu, B.; Sun, J.-Q.; Nie, Y.; Tang, Y.-Q.; Wu, X.-L. Complete genome sequence of *Deftluviimonas alba* cai42<sup>T</sup>, a microbial exopolysaccharides producer. *J. Biotechnol.* **2016**, *239*, 9–12, doi:10.1016/j.jbiotec.2016.09.017.
68. Anton, B.P.; Roberts, R.J.; Fomenkov, A.; Humbert, A.; Stoian, N.; Zeilstra-Ryalls, J. Complete genome sequences of two *Rhodobacter* strains. *Microbiol. Resour. Announc.* **2018**, *7*, doi:10.1128/MRA.01162–18.
69. Wang, P.; Wen, Z.; Li, B.; Zeng, Z.; Wang, X. Complete genome sequence of *Vibrio alginolyticus* ATCC 33787<sup>T</sup> isolated from seawater with three native megaplasmids. *Mar. Genome* **2016**, *28*, 45–47, doi:10.1016/j.margen.2016.05.003.
70. Liu, X.-F.; Cao, Y.; Zhang, H.-L.; Chen, Y.-J.; Hu, C.-J. Complete genome sequence of *Vibrio alginolyticus* ATCC 17749<sup>T</sup>. *Genome Announc.* **2015**, *3*, doi:10.1128/genomeA.01500–14.
71. Aznar, R.; Ludwig, W.; Amann, R.; Schleifer, K. Sequence determination of rRNA genes of pathogenic *Vibrio* species and whole-cell identification of *Vibrio vulnificus* with rRNA-targeted oligonucleotide probes. *Int. J. Syst. Evol. Microbiol.* **1994**, *44*, 330–337, doi:10.1099/00207713-44-2-330.
72. Sichtig, H.; Minogue, T.; Yan, Y.; Stefan, C.; Hall, A.; Tallon, L.; Sadzewicz, L.; Nadendla, S.; Klimke, W.; Hatcher, E. FDA-ARGOS is a database with public quality-controlled reference genomes for diagnostic use and regulatory science. *Nat. Commun.* **2019**, *10*, 1–13, doi:10.1038/s41467-019-11306-6.
73. Weinstock, M.T.; Heseck, E.D.; Wilson, C.M.; Gibson, D.G. *Vibrio natriegens* as a fast-growing host for molecular biology. *Nat. Methods* **2016**, *13*, 849–851, doi:10.1038/nmeth.3970.
74. Richards, G.P.; Needleman, D.S.; Watson, M.A.; Bono, J.L. Complete genome sequence of the larval shellfish pathogen *Vibrio tubiashii* type strain ATCC 19109. *Genome Announc.* **2014**, *2*, doi:10.1128/genomeA.01252–14.
75. Hernández-González, I.L.; Olmedo-Álvarez, G. Draft whole-genome sequence of the type strain *Bacillus aquimaris* TF12<sup>T</sup>. *Genome Announc.* **2016**, *4*, doi:10.1128/genomeA.00640–16.
76. Dunlap, C.A.; Saunders, L.P.; Schisler, D.A.; Leathers, T.D.; Naeem, N.; Cohan, F.M.; Rooney, A.P. *Bacillus nakamurai* sp. nov., a black-pigment-producing strain. *Int. J. Syst. Evol. Microbiol.* **2016**, *66*, 2987–2991, doi:10.1099/ijsem.0.001135.
77. Lapidus, A.; Goltsman, E.; Auger, S.; Galleron, N.; Ségurens, B.; Dossat, C.; Land, M.L.; Broussolle, V.; Brillard, J.; Guinebretiere, M.-H. Extending the *Bacillus cereus* group genomics to putative food-borne pathogens of different toxicity. *Chem. Biol. Interact.* **2008**, *171*, 236–249, doi:10.1016/j.cbi.2007.03.003.
78. Wang, J.-p.; Liu, B.; Liu, G.-h.; Chen, D.-j.; Chen, Q.-q.; Zhu, Y.-j.; Chen, Z.; Che, J.-m. Draft genome sequence of *Bacillus marisflavi* TF-11<sup>T</sup> (JCM 11544), a carotenoid-producing bacterium isolated from seawater from a tidal flat in the Yellow Sea. *Genome Announc.* **2015**, *3*, doi:10.1128/genomeA.01451–15.
79. Johnson, S.L.; Daligault, H.E.; Davenport, K.W.; Jaissle, J.; Frey, K.G.; Ladner, J.T.; Broomall, S.M.; Bishop-Lilly, K.A.; Bruce, D.C.; Gibbons, H.S. Complete genome sequences for 35 biothreat assay-relevant *Bacillus* species. *Genome Announc.* **2015**, *3*, doi:10.1128/genomeA.00151–15.
80. Whitman, W.B.; Woyke, T.; Klenk, H.-P.; Zhou, Y.; Lilburn, T.G.; Beck, B.J.; De Vos, P.; Vandamme, P.; Eisen, J.A.; Garrity, G. Genomic encyclopedia of bacterial and archaeal type strains, phase III: The genomes of soil and plant-associated and newly described type strains. *Stand. Genome Sci.* **2015**, *10*, 1–6, doi:10.1186/s40793-015-0017-x.
81. Wang, J.-p.; Liu, B.; Liu, G.-h.; Ge, C.-b.; Xiao, R.-f.; Zheng, X.-f.; Shi, H. Draft genome sequence of *Bacillus shackletonii* LMG 18435<sup>T</sup>, isolated from volcanic mossy soil. *Genome Announc.* **2016**, *4*, doi:10.1128/genomeA.01689–15.
82. Nye, T.M.; Schroeder, J.W.; Kearns, D.B.; Simmons, L.A. Complete genome sequence of undomesticated *Bacillus subtilis* strain NCIB 3610. *Genome Announc.* **2017**, *5*, doi:10.1128/genomeA.00364–17.
83. Kawato, S.; Nozaki, R.; Kondo, H.; Hirono, I. Draft genome sequences of *Vibrio atypicus* strains DSM 25292<sup>T</sup> and TUMSAT1. *Microbiol. Resour. Announc.* **2020**, *9*, doi:10.1128/MRA.01526–19.
84. Knoll, M.; Hamm, T.M.; Wagner, F.; Martinez, V.; Pleiss, J. The PHA Depolymerase Engineering Database: A systematic analysis tool for the diverse family of polyhydroxyalkanoate (PHA) depolymerases. *BMC Bioinform.* **2009**, *10*, 89, doi:10.1186/1471-2105-10-89.
85. Van Pouderoyen, G.; Eggert, T.; Jaeger, K.-E.; Dijkstra, B.W. The crystal structure of *Bacillus subtilis* lipase: A minimal  $\alpha/\beta$  hydrolase fold enzyme. *J. Mol. Biol.* **2001**, *309*, 215–226, doi:10.1006/jmbi.2001.4659.
86. Papageorgiou, A.C.; Hermawan, S.; Singh, C.B.; Jendrossek, D. Structural basis of poly (3-hydroxybutyrate) hydrolysis by PhaZ7 depolymerase from *Paucimonas lemoignei*. *J. Mol. Biol.* **2008**, *382*, 1184–1194, doi:10.1016/j.jmb.2008.07.078.

87. Wakadkar, S.; Hermawan, S.; Jendrossek, D.; Papageorgiou, A.C. The structure of PhaZ7 at atomic (1.2 Å) resolution reveals details of the active site and suggests a substrate-binding mode. *Acta Cryst.* **2010**, *F66*, 648–654, doi:10.1107/S174430911001434X.
88. Jendrossek, D.; Hermawan, S.; Subedi, B.; Papageorgiou, A.C. Biochemical analysis and structure determination of *Paucimonas lemoignei* poly (3 - hydroxybutyrate) (PHB) depolymerase PhaZ 7 muteins reveal the PHB binding site and details of substrate–enzyme interactions. *Mol. Biotechnol.* **2013**, *90*, 649–664, doi:10.1111/mmi.12391.
89. Leow, T.C.; Rahman, R.N.Z.R.A.; Basri, M.; Salleh, A.B. High level expression of thermostable lipase from *Geobacillus* sp. strain T1. *Biosci. Biotech. Bioch.* **2004**, *68*, 96–103, doi:10.1271/bbb.68.96.
90. Matsumura, H.; Yamamoto, T.; Leow, T.C.; Mori, T.; Salleh, A.B.; Basri, M.; Inoue, T.; Kai, Y.; Rahman, R.N.Z.R.A. Novel cation -  $\pi$  interaction revealed by crystal structure of thermoalkalophilic lipase. *Proteins* **2008**, *70*, 592–598, doi:10.1002/prot.21799.
91. Sharma, P.K.; Mohanan, N.; Sidhu, R.; Levin, D.B. Colonization and degradation of polyhydroxyalkanoates by lipase-producing bacteria. *Can. J. Microbiol.* **2019**, *65*, 461–475, doi:10.1139/cjm-2019-0042.
92. Jørgensen, S.; Skov, K.; Diderichsen, B. Cloning, sequence, and expression of a lipase gene from *Pseudomonas cepacia*: Lipase production in heterologous hosts requires two *Pseudomonas* genes. *J. Bacteriol.* **1991**, *173*, 559–567, doi:10.1128/jb.173.2.559-567.1991.
93. Schrag, J.D.; Li, Y.; Cygler, M.; Lang, D.; Burgdorf, T.; Hecht, H.-J.; Schmid, R.; Schomburg, D.; Rydel, T.J.; Oliver, J.D. The open conformation of a *Pseudomonas* lipase. *Structure* **1997**, *5*, 187–202, doi:10.1016/S0969-2126(97)00178-0.
94. Taipa, M.A.; Liebeton, K.; Costa, J.V.; Cabral, J.M.; Jaeger, K.-E. Lipase from *Chromobacterium viscosum*: Biochemical characterization indicating homology to the lipase from *Pseudomonas glumae*. *Biochim. Biophys. Acta (BBA)-Lipids Lipid Metab.* **1995**, *1256*, 396–402, doi:10.1016/0005-2760(95)00052-E.
95. Lang, D.; Hofmann, B.; Haalck, L.; Hecht, H.-J.; Spener, F.; Schmid, R.D.; Schomburg, D. Crystal structure of a bacterial lipase from *Chromobacterium viscosum* ATCC 6918 refined at 1.6 Å resolution. *J. Mol. Biol.* **1996**, *259*, 704–717, doi:10.1006/jmbi.1996.0352.
96. Jaeger, K.-E.; Adrian, F.-J.; Meyer, H.E.; Hancock, R.E.; Winkler, U.K. Extracellular lipase from *Pseudomonas aeruginosa* is an amphiphilic protein. *Biochim. Et Biophys. Acta (BBA)-Protein Struct. Mol. Enzymol.* **1992**, *1120*, 315–321, doi:10.1016/0167-4838(92)90254-B.
97. Nardini, M.; Lang, D.A.; Liebeton, K.; Jaeger, K.-E.; Dijkstra, B.W. Crystal structure of *Pseudomonas aeruginosa* lipase in the open conformation. The prototype for family I. 1 of bacterial lipases. *J. Biol. Chem.* **2000**, *275*, 31219–31225, doi:10.1074/jbc.M003903200.

**Publisher’s Note:** MDPI stays neutral with regard to jurisdictional claims in published maps and institutional affiliations.

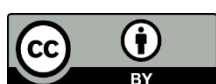

© 2020 by the authors. Submitted for possible open access publication under the terms and conditions of the Creative Commons Attribution (CC BY) license (<http://creativecommons.org/licenses/by/4.0/>).
